# Supplementary material
Source: publisher site journal article supplement (https://www.spandidos-publications.com/4345/downloadSupplementary)
Supplement: Supplementary file 1 [file downloadSupplementary]

Table SI. Association between intraTANs located inside of cancerous tubes and hematological and systemic inflammatory response parameters in patients with colorectal cancer (n=160) before and after surgery. Certain data were not available for all patients.

| Parameter                      | IntraTAN infiltration    |                                 |                           |         |
|--------------------------------|--------------------------|---------------------------------|---------------------------|---------|
|                                | Low,<br><10<br>cells/HPF | Moderate,<br>10-50<br>cells/HPF | High,<br>>50<br>cells/HPF | P-value |
| WBC, cells/ $\mu$ l            |                          |                                 |                           |         |
| Before                         | 34                       | 53                              | 29                        | 0.475   |
| After                          | 43                       | 48                              | 29                        | 0.330   |
| Lymphocytes, cells/ $\mu$ l    |                          |                                 |                           |         |
| Before                         | 52                       | 79                              | 41                        | 0.275   |
| After                          | 50                       | 88                              | 47                        | 0.046   |
| Neutrophils, cells/ $\mu$ l    |                          |                                 |                           |         |
| Before                         | 39                       | 55                              | 32                        | 0.484   |
| After                          | 36                       | 55                              | 27                        | 0.119   |
| Eosinophils, cells/ $\mu$ l    |                          |                                 |                           |         |
| Before                         | 23                       | 12                              | 15                        | 0.489   |
| After                          | 36                       | 33                              | 22                        | 0.245   |
| Basophils, cells/ $\mu$ l      |                          |                                 |                           |         |
| Before                         | 15                       | 23                              | 15                        | 0.479   |
| After                          | 23                       | 34                              | 22                        | 0.461   |
| RBC, M/ $\mu$ l                |                          |                                 |                           |         |
| Before                         | 13                       | 17                              | 9                         | 0.610   |
| After                          | 16                       | 33                              | 14                        | 0.492   |
| HGB, g/dl                      |                          |                                 |                           |         |
| Before                         | 51                       | 75                              | 41                        | 0.425   |
| After                          | 48                       | 64                              | 36                        | 0.637   |
| PLT, $1 \times 10^3$ / $\mu$ l |                          |                                 |                           |         |
| Before                         | 56                       | 86                              | 49                        | 0.886   |
| After                          | 62                       | 93                              | 52                        | 0.991   |
| NLR-PLR status                 |                          |                                 |                           |         |
| Before                         | 13                       | 23                              | 16                        | 0.182   |
| After                          | 39                       | 59                              | 32                        | 0.416   |
| PLT-NLR status                 |                          |                                 |                           |         |
| Before                         | 52                       | 68                              | 35                        | 0.908   |
| After                          | 41                       | 58                              | 33                        | 0.332   |
| MLR                            |                          |                                 |                           |         |
| Before                         | 27                       | 53                              | 29                        | 0.086   |
| After                          | 27                       | 37                              | 24                        | 0.781   |
| CEA, ng/ml                     |                          |                                 |                           |         |
| Before                         | 23                       | 23                              | 114                       | 0.042   |
| After                          | 11                       | 13                              | 136                       | 0.212   |
| CA19-9, U/ml                   |                          |                                 |                           |         |
| Before                         | 17                       | 31                              | 122                       | 0.707   |
| After                          | 7                        | 21                              | 132                       | 0.518   |
| Total protein, g/dl            |                          |                                 |                           |         |
| Before                         | 40                       | 57                              | 30                        | 0.154   |
| After                          | 6                        | 13                              | 7                         | 0.550   |
| Fibrinogen level, g/l          |                          |                                 |                           |         |
| Before                         | 27                       | 36                              | 24                        | 0.323   |
| After                          | 18                       | 19                              | 9                         | 0.279   |

WBC, white blood cells; RBC, red blood cells; HGB, hemoglobin; PLT, platelet; CEA, carcinoembryonic antigen; CA19-9, carbohydrate antigen 19-9; MLR, monocyte-to-lymphocyte ratio; NLR, neutrophil-to-lymphocyte ratio; PLT, platelet-to-lymphocyte ratio; PLR, platelet-to-lymphocyte ratio; TANs, tumor-associated neutrophils.

Table SII. Association between stromal TANs and hematological, and systemic inflammatory response parameters in patients with colorectal cancer (n=160) before and after surgery. Certain data were not available for all patients.

| Parameter                        | Stromal TANs in the centre of the tumor |      |         |
|----------------------------------|-----------------------------------------|------|---------|
|                                  | Low                                     | High | P-value |
| WBC, cells/ $\mu$ l              |                                         |      |         |
| Before                           | 92                                      | 53   | 0.565   |
| After                            | 85                                      | 56   | 0.147   |
| Lymphocytes, cells/ $\mu$ l      |                                         |      |         |
| Before                           | 93                                      | 54   | 0.325   |
| After                            | 89                                      | 52   | 0.326   |
| Neutrophils, cells/ $\mu$ l      |                                         |      |         |
| Before                           | 91                                      | 56   | 0.480   |
| After                            | 85                                      | 55   | 0.063   |
| Eosinophils, cells/ $\mu$ l      |                                         |      |         |
| Before                           | 91                                      | 54   | 0.633   |
| After                            | 83                                      | 52   | 0.425   |
| Basophils, cells/ $\mu$ l        |                                         |      |         |
| Before                           | 91                                      | 52   | 0.773   |
| After                            | 54                                      | 50   | 0.771   |
| RBC, (M/ $\mu$ l)                |                                         |      |         |
| Before                           | 91                                      | 46   | 0.060   |
| After                            | 83                                      | 56   | 0.471   |
| HGB, g/dl                        |                                         |      |         |
| Before                           | 91                                      | 52   | 0.931   |
| After                            | 85                                      | 48   | 0.150   |
| PLT ( $1 \times 10^3$ / $\mu$ l) |                                         |      |         |
| Before                           | 103                                     | 54   | 0.871   |
| After                            | 85                                      | 56   | 0.538   |
| NLR-PLR status                   |                                         |      |         |
| Before                           | 90                                      | 56   | 0.284   |
| After                            | 85                                      | 43   | 0.130   |
| PLT-NLR status                   |                                         |      |         |

|                       |    |    |       |
|-----------------------|----|----|-------|
| Before                | 93 | 58 | 0.625 |
| After                 | 85 | 53 | 0.120 |
| MLR                   |    |    |       |
| Before                | 90 | 52 | 0.656 |
| After                 | 83 | 56 | 0.432 |
| CEA, ng/ml            |    |    |       |
| Before                | 43 | 26 | 0.277 |
| After                 | 48 | 28 | 0.365 |
| CA19-9, U/ml          |    |    |       |
| Before                | 22 | 12 | 0.850 |
| After                 | 23 | 14 | 0.079 |
| Total protein, g/dl   |    |    |       |
| Before                | 14 | 22 | 0.727 |
| After                 | 28 | 9  | 0.050 |
| Fibrinogen level, g/l |    |    |       |
| Before                | 83 | 54 | 0.107 |
| After                 | 26 | 39 | 0.838 |

WBC, white blood cells; RBC, red blood cells; HGB, hemoglobin; PLT, platelet; CEA, carcinoembryonic antigen; CA19-9, carbohydrate antigen 19-9; MLR, monocyte-to-lymphocyte ratio; PLT, platelet-to-lymphocyte ratio; NLR, neutrophil-to-lymphocyte ratio; PLR status, platelet-to-lymphocyte ratio; TANs, tumor-associated neutrophils.

Table SIII. Association between necrosis in tumor tissue and hematological, and systemic inflammatory response parameters in the blood from patients with colorectal cancer (n=160) before and after surgery. Certain data were not available for all patients.

| Parameter                      | Necrosis |      |         |
|--------------------------------|----------|------|---------|
|                                | Low      | High | P-value |
| WBC, cells/ $\mu$ l            |          |      |         |
| Before                         | 102      | 55   | 0.961   |
| After                          | 96       | 51   | 0.030   |
| Lymphocytes, cells/ $\mu$ l    |          |      |         |
| Before                         | 103      | 53   | 0.693   |
| After                          | 96       | 51   | 0.304   |
| Neutrophils, cells/ $\mu$ l    |          |      |         |
| Before                         | 103      | 53   | 0.673   |
| After                          | 97       | 51   | 0.011   |
| Eosinophils, cells/ $\mu$ l    |          |      |         |
| Before                         | 101      | 52   | 0.453   |
| After                          | 95       | 51   | 0.263   |
| Basophils, cells/ $\mu$ l      |          |      |         |
| Before                         | 100      | 52   | 0.632   |
| After                          | 96       | 52   | 0.693   |
| RBC, M/ $\mu$ l                |          |      |         |
| Before                         | 103      | 53   | 0.401   |
| After                          | 95       | 51   | 0.625   |
| HGB, g/dl                      |          |      |         |
| Before                         | 103      | 53   | 0.401   |
| After                          | 96       | 51   | 0.700   |
| PLT, $1 \times 10^3$ / $\mu$ l |          |      |         |
| Before                         | 89       | 49   | 0.131   |
| After                          | 96       | 51   | 0.583   |
| NLR-PLR status                 |          |      |         |
| Before                         | 102      | 52   | 0.223   |
| After                          | 96       | 51   | 0.038   |
| PLT-NLR status                 |          |      |         |
| Before                         | 103      | 53   | 0.295   |
| After                          | 96       | 51   | 0.030   |
| MLR                            |          |      |         |
| Before                         | 102      | 52   | 0.023   |
| After                          | 94       | 50   | 0.717   |
| CEA, ng/ml                     |          |      |         |
| Before                         | 47       | 113  | 0.936   |
| After                          | 27       | 133  | 0.011   |
| CA19-9, U/ml                   |          |      |         |
| Before                         | 29       | 131  | 0.092   |
| After                          | 25       | 135  | 0.160   |
| Total protein, g/dl            |          |      |         |
| Before                         | 12       | 10   | 0.482   |

|                       |    |    |       |
|-----------------------|----|----|-------|
| After                 | 30 | 15 | 0.825 |
| Fibrinogen level, g/l |    |    |       |
| Before                | 91 | 48 | 0.338 |
| After                 | 27 | 12 | 0.261 |

WBC, white blood cells; RBC, red blood cells; HGB, haemoglobin; PLT, platelet; CEA, carcinoembryonic antigen; CA19-9, carbohydrate antigen 19-9; MLR, monocyte-to-lymphocyte ratio; NLR, neutrophil-to-lymphocyte ratio; PLT, platelet-to-lymphocyte ratio; PLR, platelet-to-lymphocyte ratio.

Table SIV. Association between intraTANs, stromaTANs or necrosis and hematological and systemic inflammatory response parameters from the blood of patients with colorectal cancer (n=160) before and after surgery. Certain data were not available for all patients.

| Parameter                      | Group number |    |    |    | P-value |
|--------------------------------|--------------|----|----|----|---------|
|                                | 1            | 2  | 3  | 4  |         |
| WBC, cells/ $\mu$ l            |              |    |    |    |         |
| Before                         | 24           | 29 | 40 | 51 | 0.382   |
| After                          | 21           | 29 | 38 | 51 | 0.096   |
| Lymphocytes, cells/ $\mu$ l    |              |    |    |    |         |
| Before                         | 24           | 29 | 45 | 51 | 0.769   |
| After                          | 21           | 29 | 38 | 50 | 0.081   |
| Neutrophils, cells/ $\mu$ l    |              |    |    |    |         |
| Before                         | 24           | 29 | 41 | 51 | 0.851   |
| After                          | 21           | 29 | 38 | 50 | 0.198   |
| Eosinophils, cells/ $\mu$ l    |              |    |    |    |         |
| Before                         | 24           | 28 | 40 | 51 | 0.758   |
| After                          | 21           | 29 | 37 | 50 | 0.632   |
| Basophils, cells/ $\mu$ l      |              |    |    |    |         |
| Before                         | 23           | 29 | 45 | 51 | 0.804   |
| After                          | 20           | 25 | 38 | 50 | 0.942   |
| RBC, M/ $\mu$ l                |              |    |    |    |         |
| Before                         | 24           | 29 | 53 | 50 | 0.088   |
| After                          | 21           | 29 | 38 | 51 | 0.643   |
| HGB, g/dl                      |              |    |    |    |         |
| Before                         | 25           | 28 | 53 | 49 | 0.187   |
| After                          | 21           | 29 | 38 | 41 | 0.813   |
| PLT, $1 \times 10^3$ / $\mu$ l |              |    |    |    |         |
| Before                         | 24           | 29 | 41 | 51 | 0.736   |
| After                          | 21           | 29 | 38 | 50 | 0.124   |
| NLR-PLR status                 |              |    |    |    |         |
| Before                         | 24           | 29 | 50 | 51 | 0.559   |
| After                          | 21           | 29 | 38 | 49 | 0.159   |
| PLT-NLR status                 |              |    |    |    |         |
| Before                         | 22           | 30 | 53 | 50 | 0.505   |
| After                          | 21           | 29 | 38 | 49 | 0.129   |
| MLR                            |              |    |    |    |         |
| Before                         | 24           | 29 | 41 | 50 | 0.815   |
| After                          | 20           | 29 | 38 | 50 | 0.720   |
| CEA, ng/ml                     |              |    |    |    |         |

|                       |    |    |    |    |       |
|-----------------------|----|----|----|----|-------|
| Before                | 16 | 32 | 49 | 63 | 0.029 |
| After                 | 10 | 44 | 48 | 68 | 0.371 |
| CA19-9, U/ml)         |    |    |    |    |       |
| Before                | 49 | 44 | 44 | 33 | 0.404 |
| After                 | 15 | 25 | 69 | 55 | 0.371 |
| Total protein, g/dl   |    |    |    |    |       |
| Before                | 3  | 6  | 4  | 8  | 0.375 |
| After                 | 9  | 9  | 13 | 14 | 0.388 |
| Fibrinogen level, g/l |    |    |    |    |       |
| Before                | 23 | 28 | 34 | 50 | 0.825 |
| After                 | 21 | 29 | 38 | 51 | 0.858 |

Group 1, low intraTANs, stromaTANs and necrosis; Group 2, low intraTANs, and high stromaTANs and necrosis); Group 3, high intraTANs, and low stromaTANs and necrosis; Group 4, high intraTANs, stromaTANs and necrosis; WBC, white blood cells; RBC, red blood cells; HGB, hemoglobin; PLT, platelet; CEA, carcinoembryonic antigen; CA19-9, carbohydrate antigen 19-9; MLR, monocyte-to-lymphocyte ratio; NLR, neutrophil-to-lymphocyte ratio; PLT, platelet-to-lymphocyte ratio; PLR, platelet-to-lymphocyte ratio; TANs, tumor-associated neutrophils.
